# Supplementary material for: Perturbation of invadolysin disrupts cell migration in zebrafish (Danio rerio)
Source: PubMed Central journal article supplement (PMC3632754; doi:10.1016/j.yexcr.2013.02.005), 2013-05-01

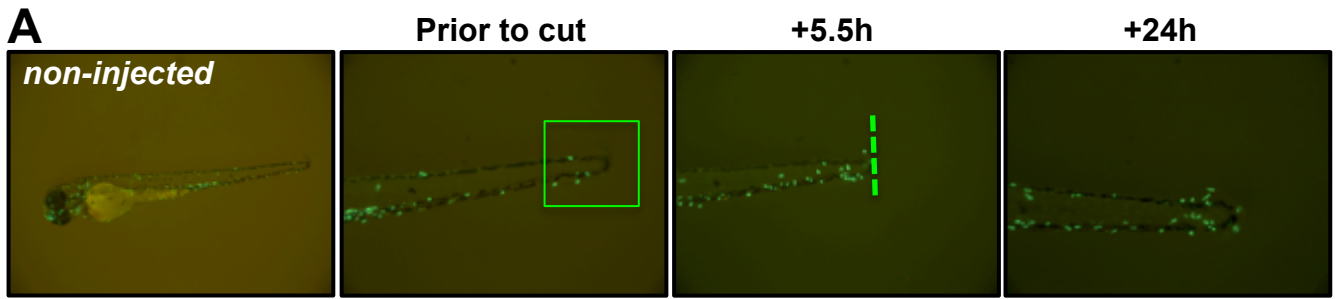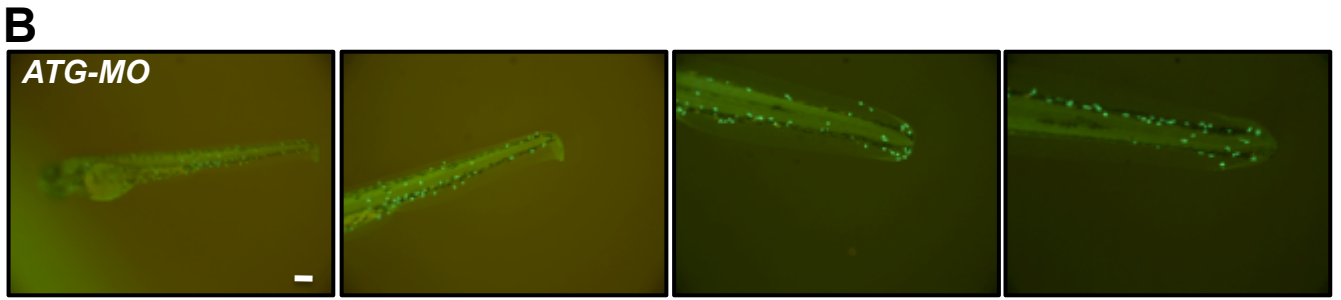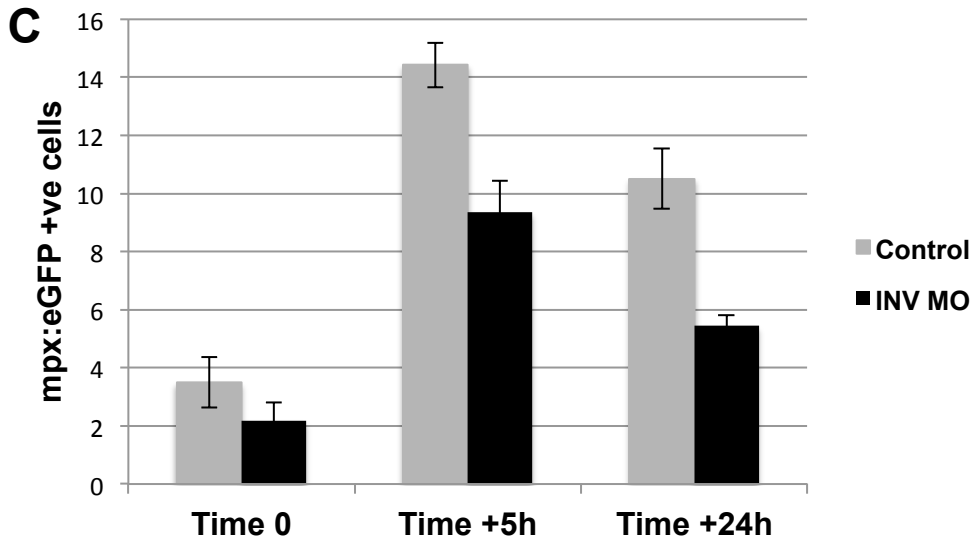

Supplement: mmc2.pdf [file mmc2.pdf]
